# Supplementary material for: Pigs Overexpressing Porcine β-Defensin 2 Display Increased Resilience to Glaesserella parasuis Infection
Source: Antibiotics (Basel). 2020 Dec 14;9(12):903. doi: 10.3390/antibiotics9120903 (PMC7764891; doi:10.3390/antibiotics9120903)
Supplement: Supplementary file 1 [file antibiotics-09-00903-s001.pdf]

## Article

# Pigs Overexpressing Porcine $\beta$ -Defensin 2 Display Increased Resilience to *Glaesserella parasuis* Infection

Jing Huang <sup>1,2,†</sup>, Xiaoyu Yang <sup>1,2,†</sup>, Antian Wang <sup>1,2</sup>, Chao Huang <sup>1,2</sup>, Hao Tang <sup>1,2</sup>, Qihong Zhang <sup>1,2</sup>, Qiong Fang <sup>1,2</sup>, Zuming Yu <sup>1,2</sup>, Xiao Liu <sup>1,2</sup>, Qi Huang <sup>1,2</sup>, Rui Zhou <sup>1,2,3,\*</sup> and Lu Li <sup>1,2,4,\*</sup>

<sup>1</sup> State Key Laboratory of Agricultural Microbiology, College of Veterinary Medicine, Huazhong Agricultural University, Wuhan 430070, China; jing\_huang@webmail.hzau.edu.cn (J.H.); yangxiaoyu0118@webmail.hzau.edu.cn (X.Y.); wangantian@webmail.hzau.edu.cn (A.W.); huangchao\_1991@webmail.hzau.edu.cn (C.H.); 2019302110155@webmail.hzau.edu.cn (H.T.); zhangqihong@webmail.hzau.edu.cn (Q.Z.); fangqiong@webmail.hzau.edu.cn (Q.F.); yzm@webmail.hzau.edu.cn (Z.Y.); liuxiao324@webmail.hzau.edu.cn (X.L.); qhuang@mail.hzau.edu.cn (Q.H.)

<sup>2</sup> Cooperative Innovation Center for Sustainable Pig Production, College of Veterinary Medicine, Huazhong Agricultural University, Wuhan 430070, China

<sup>3</sup> International Research Center for Animal Disease, Ministry of Science and Technology of China, Wuhan 430070, China

<sup>4</sup> Key Laboratory of Development of Veterinary Diagnostic Products, Ministry of Agriculture and Rural Affairs of China, Wuhan 430070, China

\* Correspondence: rzhou@mail.hzau.edu.cn (R.Z.); lilu@mail.hzau.edu.cn (L.L.)

† These authors contributed equally to this work.

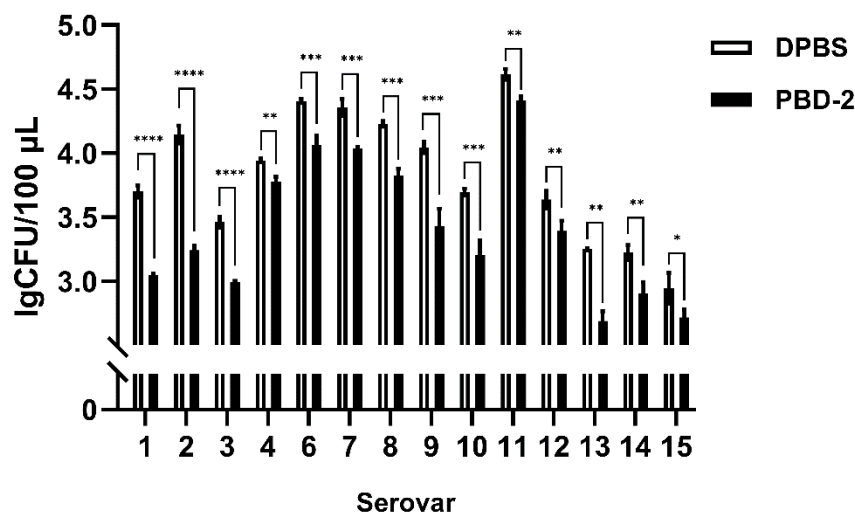

**Figure S1.** Bactericidal activity of porcine  $\beta$ -defensin 2 (PBD-2) against different *Glaesserella parasuis* serovars. PBD-2 was incubated with different *G. parasuis* serovars for 1 h before plating and counting the surviving bacteria. Bacterial culture with Dulbecco's phosphate-buffered saline (DPBS) was used as a negative control. Data are presented as mean  $\pm$  SD and are plotted from three independent experiments. \*  $p < 0.05$ , \*\*  $p < 0.01$ , \*\*\*  $p < 0.001$ , \*\*\*\*  $p < 0.0001$ , unpaired one-tailed Student's  $t$ -test.

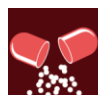**Table S1.** Score for clinical signs of pigs during cohabitation.

| Number    | Day 0 | Day 1 | Day 2 | Day 3 | Day 4 |
|-----------|-------|-------|-------|-------|-------|
| 21 (WT)   | 0     | 2     | 2     | 1     | 0     |
| 23 (WT)   | 0     | 3     | 3     | 1     | 1     |
| 201 (WT)  | 0     | 2     | 2     | 1     | 0     |
| 210 (WT)  | 0     | 1     | 2     | 2     | 1     |
| 214 (WT)  | 0     | 3     | 3     | 2     | 1     |
| 217 (WT)  | 0     | 3     | 3     | 1     | 1     |
| 13 (TG)   | 0     | 2     | 2     | 1     | 0     |
| 103 (TG)  | 0     | 1     | 1     | 0     | 0     |
| 105 (TG)  | 0     | 3     | 2     | 1     | 1     |
| 202 (TG)  | 0     | 2     | 2     | 0     | 0     |
| 212 (TG)  | 0     | 2     | 2     | 1     | 1     |
| 28 (Mock) | 0     | 0     | 0     | 0     | 0     |
| 86 (Mock) | 0     | 0     | 0     | 0     | 0     |
| 20 (Mock) | 0     | 0     | 0     | 0     | 0     |

Decreased appetite, shortness of breath and walking difficulty representing one point each. Wild-type (WT) and transgenic (TG) pigs were co-housed with other pigs intratracheally infected with *G. parasuis*, while pigs in the mock group were raised separately.

**Table S2.** Score for macroscopic pathological changes after dissecting pigs.

| Number    | Pleurisy | Peritonitis | Meningitis | Pericarditis | Hepatitis | Splenitis | Pneumonia | Total score |
|-----------|----------|-------------|------------|--------------|-----------|-----------|-----------|-------------|
| 21 (WT)   | 0        | 0           | 1          | 0            | 1         | 0         | 1         | 3           |
| 23 (WT)   | 0        | 0           | 1          | 0            | 1         | 0         | 1         | 3           |
| 201 (WT)  | 0        | 0           | 1          | 1            | 1         | 0         | 1         | 4           |
| 210 (WT)  | 0        | 0           | 1          | 1            | 1         | 0         | 1         | 4           |
| 214 (WT)  | 0        | 0           | 1          | 0            | 1         | 0         | 1         | 3           |
| 217 (WT)  | 0        | 0           | 1          | 0            | 1         | 0         | 1         | 3           |
| 13 (TG)   | 0        | 0           | 1          | 0            | 0         | 0         | 1         | 2           |
| 103 (TG)  | 0        | 0           | 1          | 0            | 0         | 0         | 0         | 1           |
| 105 (TG)  | 0        | 0           | 1          | 0            | 0         | 0         | 1         | 2           |
| 202 (TG)  | 0        | 0           | 1          | 0            | 1         | 0         | 1         | 3           |
| 212 (TG)  | 0        | 0           | 1          | 0            | 0         | 0         | 1         | 2           |
| 28 (Mock) | 0        | 0           | 0          | 0            | 0         | 0         | 0         | 0           |
| 86 (Mock) | 0        | 0           | 0          | 0            | 0         | 0         | 0         | 0           |
| 20 (Mock) | 0        | 0           | 0          | 0            | 0         | 0         | 0         | 0           |

Scoring scale from 0 to 3, with 3 being the severest. WT and TG pigs were co-housed with other pigs intratracheally infected with *G. parasuis*, while pigs in the mock group were raised separately.
